# Supplementary material for: The Effect of Real-Time Video-Based Engagement and Feedback during Pedaling on Cadence Control and Exercise Motivation: A Proof-of-Concept Study
Source: MDPI journal article supplement (doi:10.3390/bioengineering8070095), 2021-07-05
Supplement: s1 [file s1]

## SUPPLEMENTARY MATERIAL

### Exercise Feedback Survey

1. Did you notice a difference between exercise sessions when you received feedback compared to when you didn't?
  - No
  - Yes. The difference could be described as \_\_\_\_\_  
\_\_\_\_\_  
\_\_\_\_\_
2. If you found the two sessions different, how would you describe the session in which feedback was provided?
  - Strongly enjoyed
  - Enjoyed
  - ☐ It didn't matter to me (neutral)
  - Somewhat troublesome
  - A hindrance
3. In future, would you choose to perform exercise with feedback?
  - Yes
  - No
  - Undecided
4. In future, would feedback encourage you to exercise more?
  - Yes
  - No

Table S1: Post-exercise feedback survey results for questions 1, 3 and 4.

|                                                                                                             | Feedback |     | Engagement |     |
|-------------------------------------------------------------------------------------------------------------|----------|-----|------------|-----|
|                                                                                                             | Yes      | No  | Yes        | No  |
| Did you find a difference between exercise sessions when you received feedback compared to when you didn't? | 100%     | 0%  | 100%       | 0%  |
| In future, would you choose to perform exercise with feedback?                                              | 89%      | 11% | 89%        | 11% |
| Would feedback encourage you to exercise more?                                                              | 89%      | 11% | 94%        | 6%  |
